# Supplementary material
Source: publisher figshare collection journal article supplement (https://karger.figshare.com/articles/dataset/_/4570000)
Supplement: Supplementary file 1 [file 1]

|  | Negative binomial  (non-excess zero) Model† | | Logistic (excess  zero) Model‡ | |
| --- | --- | --- | --- | --- |
|  | Unadjusted | Adjusted* | Unadjusted | Adjusted* |
| Variable | Estimate (SE) | Estimate (SE) | Estimate (SE) | Estimate (SE) |
| Intercept | 1.0377 (0.092) | -0.2101 (0.272) | 1.2157 (0.122) | 4.6489 (0.489) |
| Lead Category (Ref: <2 µg/dL) |  |  |  |  |
| 2-5 µg/dL | 0.2864 (0.141) | 0.2967 (0.078) | -0.4019 (0.163) | -0.3895 (0.183) |
| 5-10 µg/dL | 0.3358 (0.154) | 0.5451 (0.123) | -0.4011 (0.219) | -0.2643 (0.278) |
| >10 µg/dL | 0.2343 (0.209) | 0.4032 (0.139) | -0.5990 (0.238) | -0.2982 (0.363) |
| Sex (Ref: Female) |  | -0.0189 (0.089) |  | 0.1840 (0.159) |
| Race/Ethnicity (Ref: Non-Hispanic White) |  |  |  |  |
| Non-Hispanic Black |  | -0.1195 (0.107) |  | -0.6268 (0.236) |
| Mexican-American |  | 0.0190 (0.122) |  | -0.8676 (0.265) |
| Other |  | 0.4126 (0.117) |  | -0.6584 (0.411) |
| Age (Ref: 2 years) |  |  |  |  |
| 3 years |  | 0.3986 (0.116) |  | -0.9465 (0.313) |
| 4 years |  | 0.2089 (0.127) |  | -1.6418 (0.285) |
| 5 years |  | 0.5394 (0.112) |  | -2.0010 (0.268) |
| Urban Status (Ref: Urban) |  | 0.0796 (0.069) |  | -0.3082 (0.172) |
| Census Region (Ref: Northeast) |  |  |  |  |
| South |  | 0.2848 (0.137) |  | 0.1737 (0.319) |
| West |  | 0.1840 (0.110) |  | -0.3563 (0.328) |
| Mid-west |  | 0.0180 (0.123) |  | 0.1106 (0.294) |
| Poverty Index (Ref: Above Poverty Line) |  | -0.1562 (0.098) |  | -0.3319 (0.198) |
| Highest Household Education (Ref: High School) |  |  |  |  |
| Less than High School |  | -0.0401 (0.100) |  | 0.0049 (0.294) |
| More than High School |  | -0.1752 (0.142) |  | -0.1128 (0.208) |
| Smoking in Household (Ref: No) |  | -0.0210 (0.081) |  | -0.7698 (0.156) |
| Birthweight (Ref: 2500g-4100g) |  |  |  |  |
| < 2500 g |  | 0.1620 (0.124) |  | 0.5286 (0.366) |
| > 4100 g |  | -0.0665 (0.186) |  | 0.2004 (0.329) |
| Breastfed (Ref: No) |  | 0.1559 (0.076) |  | 0.0414 (0.208) |
| Last Dental Visit (Ref: Never) |  | 0.1174 (0.078) |  | -0.3996 (0.203) |
| Parent/Guardian Perception of Child’s Teeth (Ref: Excellent) |  |  |  |  |
| Very good/good |  | 0.3550 (0.145) |  | -1.2472 (0.219) |
| Fair/poor |  | 0.9947 (0.127) |  | -3.4570 (0.356) |
| Alpha (Overdispersion parameter) | 0.6690 (0.082) | 0.2924 (0.067) |  |  |
